# Supplementary material for: LINC00152 knockdown suppresses tumorigenesis in non-small cell lung cancer via sponging miR-16-5p
Source: PubMed Central journal article supplement — J Thorac Dis. 2022 Mar;14(3):614–24. doi: 10.21037/jtd-22-59 (PMC8987817; doi:10.21037/jtd-22-59), 2022-03
Supplement: jtd-14-03-614-supplementary.pdf [file jtd-14-03-614-supplementary.pdf]

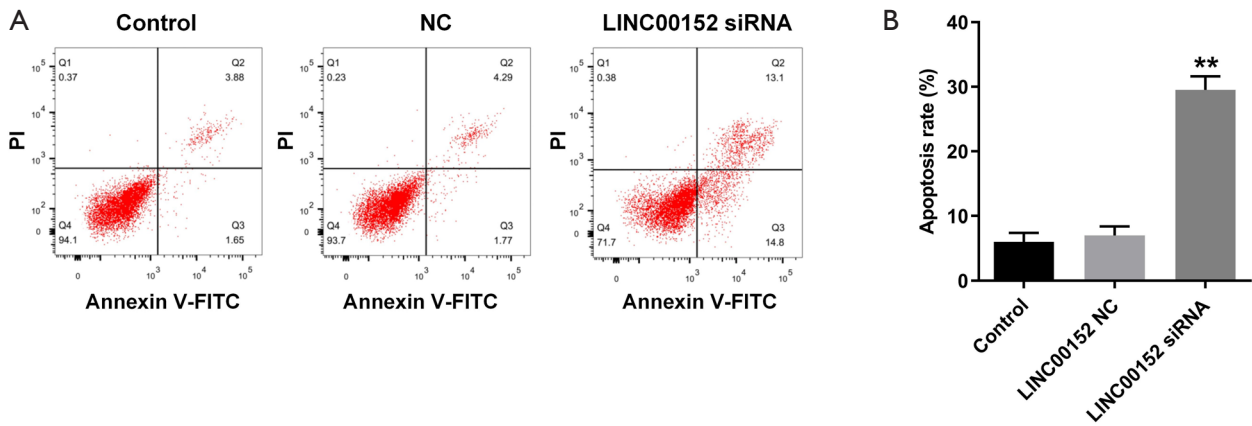

**Figure S1** Knockdown of LINC00152 induces the apoptosis of NCI-H838 cells. (A,B) NCI-H838 cells were transfected with NC or LINC00152 siRNA. Next, the apoptosis of NCI-H838 cells was tested by flow cytometry. \*\*,  $P < 0.01$  compared with the control. NC, negative control.
